# Supplementary material for: Size-matching encapsulation of a high-nuclearity Ni-containing polyoxometalate into a light-responsive MOF for robust photogeneration of hydrogen
Source: Royal Society of Chemistry journal article supplement (doi:10.1039/d2ta09606d), 2023-01-01
Supplement: d2ta09606d1.pdf [file d2ta09606d1.pdf]

## SUPPORTING INFORMATION

### Size-matching encapsulation of high-nuclearity Ni-containing polyoxometalate into light-responsive MOF for robust photogeneration of hydrogen

Ruijie Wang, Yeqin Feng, Le Jiao, Yuanyuan Dong, Hui Zhou, Tianfu Liu,\* Xuemeng Jing,  
Hongjin Lv\*

MOE Key Laboratory of Cluster Science, Beijing Key Laboratory of  
Photoelectroic/Electrophotonic Conversion Materials, School of Chemistry and Chemical  
Engineering, Beijing Institute of Technology, Beijing 102488, P. R. China.

Corresponding email: [hlv@bit.edu.cn](mailto:hlv@bit.edu.cn); [liutf@bit.edu.cn](mailto:liutf@bit.edu.cn)

## Table of Contents

### 1. Figs. S1-S8

|                                                                                                                                                                                                    |    |
|----------------------------------------------------------------------------------------------------------------------------------------------------------------------------------------------------|----|
| <b>Fig. S1</b> PXRD patterns of $\text{Ni}_{16}\text{As}_4\text{P}_4$ , $0.1\text{-Ni}_{16}\text{As}_4\text{P}_4@\text{NU-1000}$ and NU-1000 .....                                                 | S3 |
| <b>Fig. S2</b> Linear energy dispersive X-ray spectrum the $0.1\text{-Ni}_{16}\text{As}_4\text{P}_4@\text{NU-1000}$ .....                                                                          | S2 |
| <b>Fig. S3</b> Photocatalytic hydrogen evolution of $1.0\text{-Ni}_{16}\text{As}_4\text{P}_4@\text{NU-1000}$ at different<br>pH values. ....                                                       | S4 |
| <b>Fig. S4</b> Photocatalytic hydrogen evolution of $0.1\text{-Ni}_{16}\text{As}_4\text{P}_4@\text{NU-1000}$ with various<br>concentration of AA. ....                                             | S4 |
| <b>Fig. S5</b> Photocatalytic hydrogen evolution of $0.1\text{-Ni}_{16}\text{As}_4\text{P}_4@\text{NU-1000}$ with various<br>amount of $\text{Ni}_{16}\text{As}_4\text{P}_4@\text{NU-1000}$ . .... | S4 |

|                                                                                                                                                        |    |
|--------------------------------------------------------------------------------------------------------------------------------------------------------|----|
| <b>Fig. S6</b> FT-IR spectra of 0.1-Ni <sub>16</sub> As <sub>4</sub> P <sub>4</sub> @NU-1000 before and after photocatalysis. ....                     | S5 |
| <b>Fig. S7</b> Fig S6 EDS mapping of 0.1-Ni <sub>16</sub> As <sub>4</sub> P <sub>4</sub> @NU-1000 after photocatalytic hydrogen evolution for 6h. .... | S5 |
| <b>Fig. S8</b> High resolution-TEM image of 0.1-Ni <sub>16</sub> As <sub>4</sub> P <sub>4</sub> @NU-1000 after photocatalysis. ...                     | S6 |
| <b>Fig. S9</b> Cyclic voltammetry of Ni <sub>16</sub> As <sub>4</sub> P <sub>4</sub> in 0.1M H <sub>2</sub> SO <sub>4</sub> aqueous solution. ....     | S7 |

## 2. Tables S1-S2

|                                                                                                                                                                  |    |
|------------------------------------------------------------------------------------------------------------------------------------------------------------------|----|
| <b>Table S1.</b> PL decay (at 488 nm) lifetimes of NU-1000, 0.1-Ni <sub>16</sub> As <sub>4</sub> P <sub>4</sub> @NU-1000 samples upon excitation at 365 nm. .... | S8 |
| <b>Table S2.</b> Comparison of different POM@MOF composite as catalysts for photocatalytic H <sub>2</sub> evolution reduction. ....                              | S8 |

## 3. Apparent quantum yield calculation .....S8

## 4. References .....S9

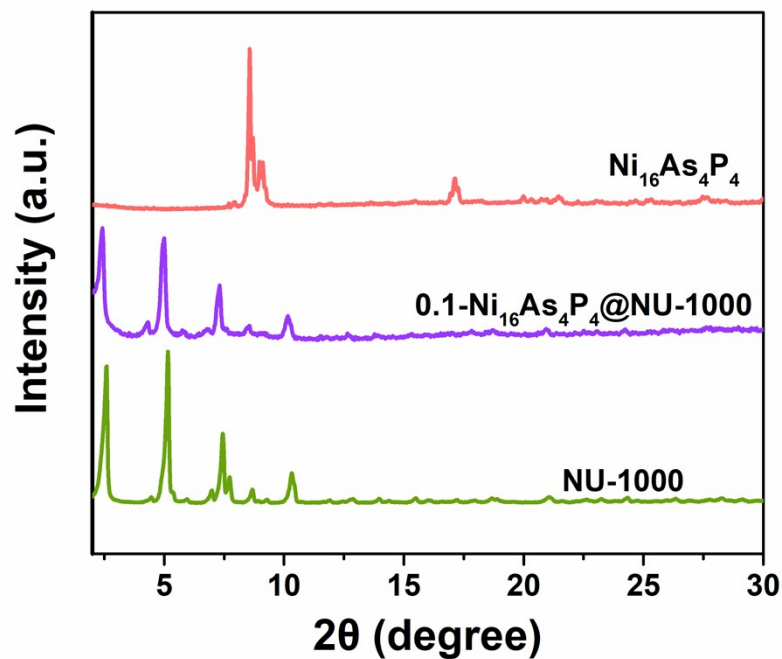

Fig. S1 PXRD patterns of  $\text{Ni}_{16}\text{As}_4\text{P}_4$ ,  $0.1\text{-Ni}_{16}\text{As}_4\text{P}_4@\text{NU-1000}$  and NU-1000.

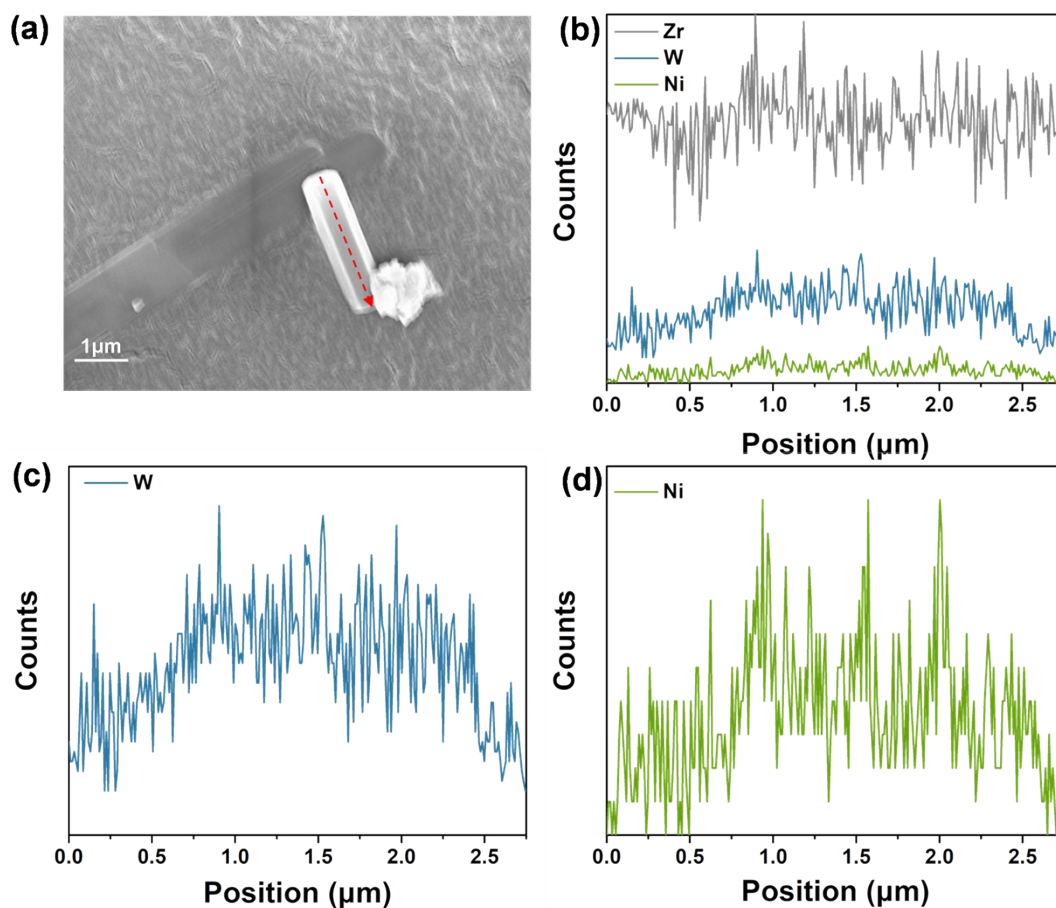

Fig. S2 (a) Scanning electron microscopy (SEM) micrograph and (b) linear energy dispersive X-ray (EDS) spectrum of different elements of the  $0.1\text{-Ni}_{16}\text{As}_4\text{P}_4@\text{NU-1000}$  sample collected along the red dash line shown in Figure S2a, (c, d) enlarged linear EDS signals of W and Ni elements.

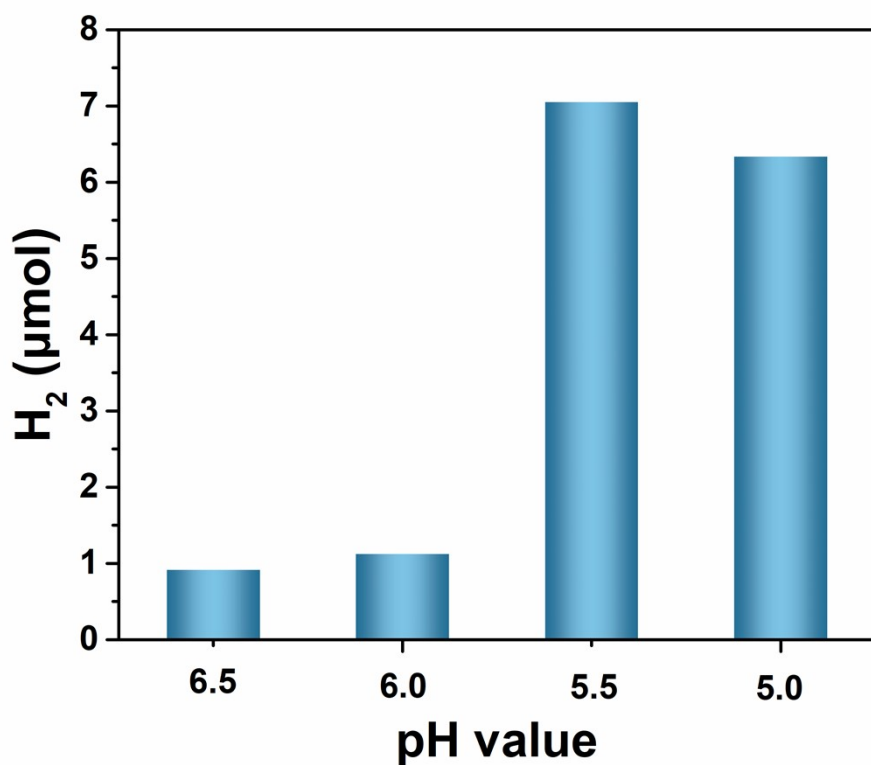

Fig. S3 Photocatalytic hydrogen evolution of 1.0- $\text{Ni}_{16}\text{As}_4\text{P}_4$ @NU-1000 at different pH values. Conditions: 2 mg of 1.0- $\text{Ni}_{16}\text{As}_4\text{P}_4$ @NU-1000, 20 mL of 1 M AA aqueous solution, 300 W Xe-lamp, reaction time of 6 h.

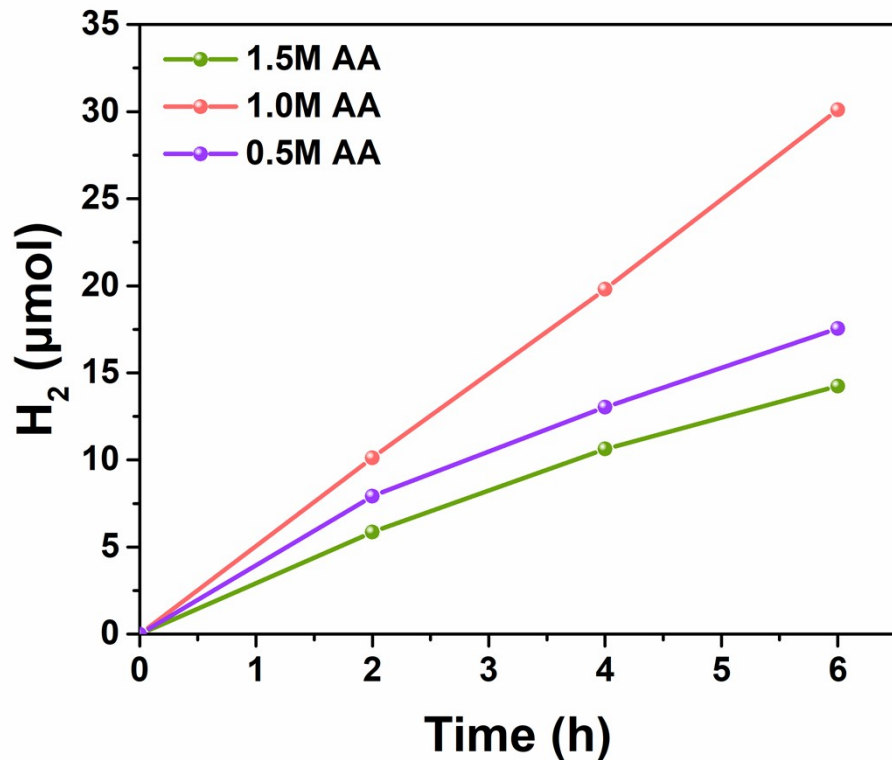

Fig. S4 Photocatalytic hydrogen evolution of 0.1- $\text{Ni}_{16}\text{As}_4\text{P}_4$ @NU-1000 with various concentration of AA. Conditions: 0.1- $\text{Ni}_{16}\text{As}_4\text{P}_4$ @NU-1000, 20 mL of AA aqueous solution at pH 5.5, 300 W Xe-lamp.

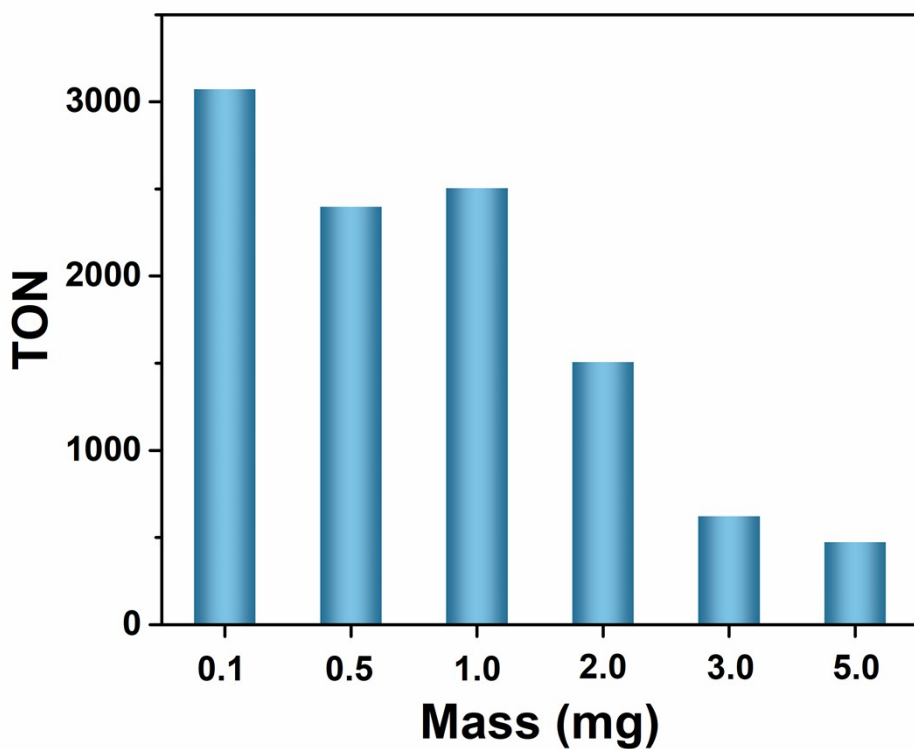

Fig. S5 Photocatalytic hydrogen evolution with the different usage amount of 0.1- $\text{Ni}_{16}\text{As}_4\text{P}_4@NU-1000$  during photocatalysis. Conditions: 0.1- $\text{Ni}_{16}\text{As}_4\text{P}_4@NU-1000$ , 20 mL of 1 M AA aqueous solution at pH 5.5, 300 W Xe-lamp, reaction time of 6 h.

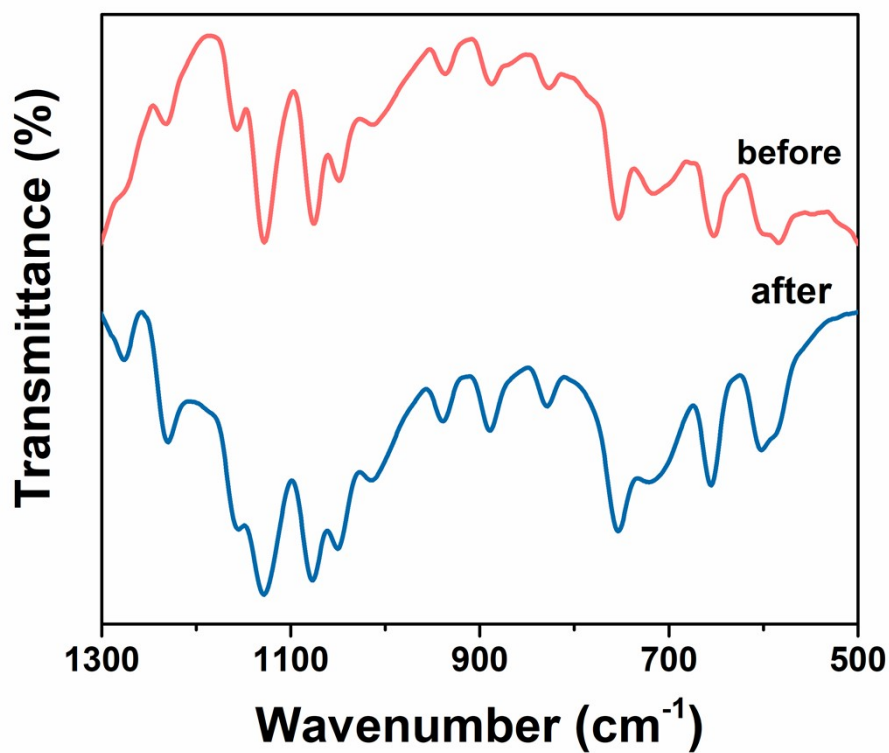

Fig. S6 FT-IR spectra of 0.1- $\text{Ni}_{16}\text{As}_4\text{P}_4@NU-1000$  before and after photocatalysis for 6 h.



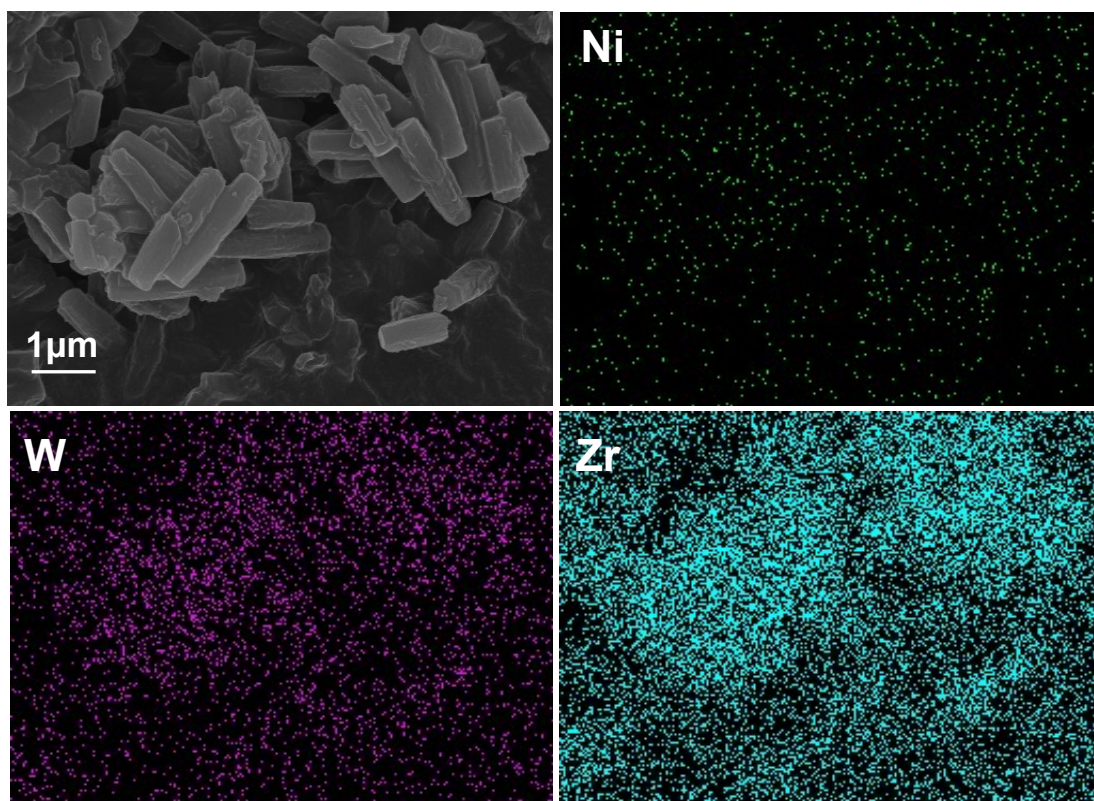

Fig. S7 EDS mapping images of 0.1-Ni<sub>16</sub>As<sub>4</sub>P<sub>4</sub>@NU-1000 after photocatalytic hydrogen evolution for 6 h.

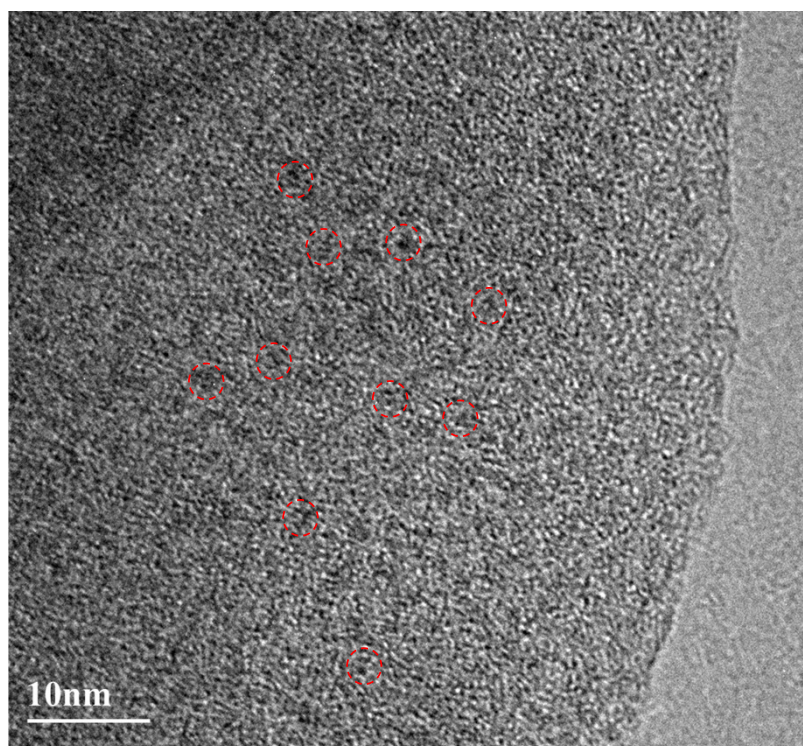

Fig. S8 High resolution-TEM image of 0.1-Ni<sub>16</sub>As<sub>4</sub>P<sub>4</sub>@NU-1000 after photocatalysis for 6 h.

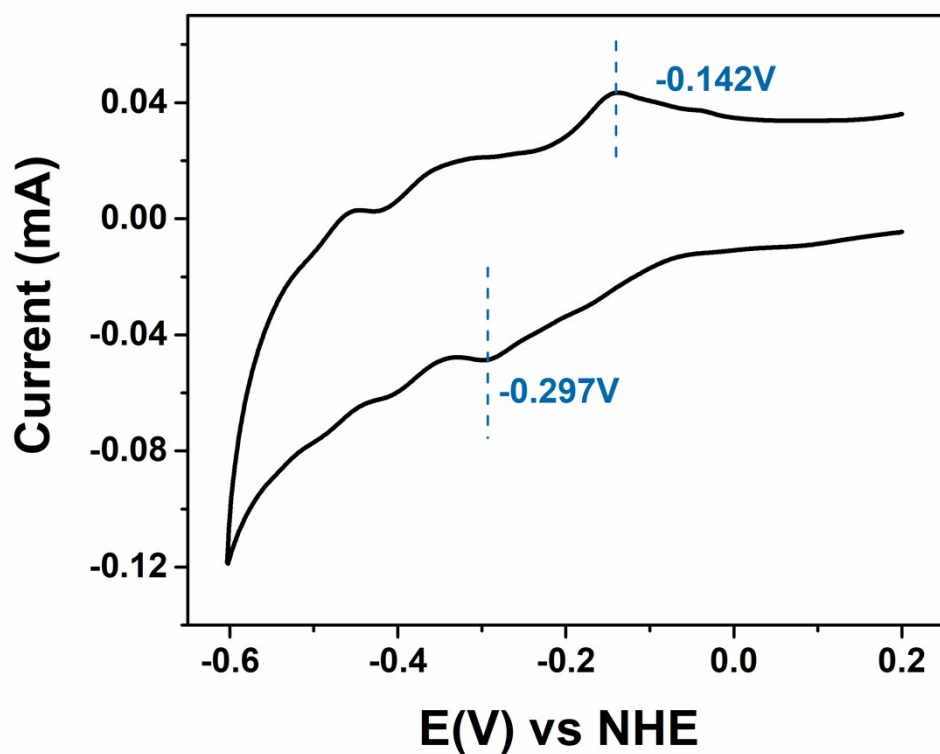

Fig. S9 Cyclic voltammetry curve of  $\text{Ni}_{16}\text{As}_4\text{P}_4$  in 0.1M  $\text{H}_2\text{SO}_4$  aqueous solution with a three-electrode cell comprising of a glassy carbon working electrode, a Pt wire auxiliary electrode, and a saturated Ag/AgCl reference electrode. LUMO potential of  $\text{Ni}_{16}\text{As}_4\text{P}_4$  was calculated according to the following equation:  $E(\text{LUMO}) = E_{1/2} = (E_{pc} + E_{pa}) / 2$

## 2. Table S1-S2

Table S1. Comparison of different POM@MOF composites as catalysts for photocatalytic H<sub>2</sub> evolution reaction.

| Catalysts                                                | Photosensitizer                                                | Sacrificial reagent | TON   | Time | Ref.      |
|----------------------------------------------------------|----------------------------------------------------------------|---------------------|-------|------|-----------|
| P <sub>2</sub> W <sub>15</sub> V <sub>3</sub> @MIL-101   | [Ru(bpy) <sub>3</sub> ] <sup>2+</sup>                          | TEOA                | 70    | 8h   | 1         |
| Ni <sub>4</sub> P <sub>2</sub> @MOF-1                    | Covalently-linked [Ru(bpy) <sub>3</sub> ] <sup>2+</sup> moiety | methanol            | 1476  | 72h  | 2         |
| P <sub>2</sub> W <sub>18</sub> @UiO                      | Covalently-linked [Ru(bpy) <sub>3</sub> ] <sup>2+</sup> moiety | TEOA                | 79    | 14h  | 3         |
| PW <sub>12</sub> -Pt@NH <sub>2</sub> -MIL-53             | MIL-53 framework                                               | AA                  | 66    | 6h   | 4         |
| WD-POM@SMOF-1                                            | [Ru(bpy) <sub>3</sub> ] <sup>2+</sup> units                    | TEOA                | 392   | 12h  | 5         |
| Ni <sub>3</sub> P <sub>2</sub> W <sub>16</sub> @NU-1000  | NU-1000 framework                                              | AA                  | 2714  | 12h  | 6         |
| P <sub>2</sub> W <sub>18</sub> @NU-1000-Pt               | NU-1000 framework                                              | AA                  | 5464  | 120h | 7         |
| Ni <sub>16</sub> As <sub>4</sub> P <sub>4</sub> @NU-1000 | NU-1000 framework                                              | AA                  | 28600 | 120h | This work |

Table S2. Luminescence decay lifetimes of NU-1000, 0.1-Ni<sub>16</sub>As<sub>4</sub>P<sub>4</sub>@NU-1000 samples upon excitation at 365 nm.

| Samples                                                      | τ <sub>1</sub> (ns) | τ <sub>2</sub> (ns) | τ <sub>3</sub> (ns) |
|--------------------------------------------------------------|---------------------|---------------------|---------------------|
| NU-1000                                                      | 0.75                | 3.92                | 16.53               |
| 0.1-Ni <sub>16</sub> As <sub>4</sub> P <sub>4</sub> @NU-1000 | 0.48                | 2.36                | 13.21               |

## 3. Apparent quantum yield calculation

$$n_{\text{photons}} = \frac{Pt\lambda}{hcNA} = 3.568 \times 10^{-3} \text{ mol}$$

$$\text{AQY}(\%) = \frac{2 \times n_{\text{H}_2}}{n_{\text{photons}}} \times 100\% = 1.715\%$$

Where P is the illumination power (P=EA<sub>R</sub>, E=2.6 mW/cm<sup>2</sup>), A<sub>R</sub> is the irradiation area (πR<sup>2</sup>, R=2.1cm), t is the illumination time (s, in our cases t =21600 s), equivalent wavelength λ=549 nm for full optical Xe-lamp, h is the Planck constant, c is the velocity of light and NA is Avogadro's number. The illumination time (t = 21600 s) and hydrogen generation amount are based on data recorded in 6-hour timescale.



## 4. References

1. H. Li, S. Yao, H.-L. Wu, J.-Y. Qu, Z.-M. Zhang, T.-B. Lu, W. Lin and E.-B. Wang, *Appl. Catal. B. Environ.*, 2018, **224**, 46-52.
2. X. J. Kong, Z. Lin, Z. M. Zhang, T. Zhang and W. Lin, *Angew. Chem. Int. Ed.*, 2016, **55**, 6411-6416.
3. Z. M. Zhang, T. Zhang, C. Wang, Z. Lin, L. S. Long and W. Lin, *J. Am. Chem. Soc.*, 2015, **137**, 3197-3200.
4. W. Guo, H. Lv, Z. Chen, K. P. Sullivan, S. M. Lauinger, Y. Chi, J. M. Sumliner, T. Lian and C. L. Hill, *J. Mater. Chem. A*, 2016, **4**, 5952-5957.
5. J. Tian, Z. Y. Xu, D. W. Zhang, H. Wang, S. H. Xie, D. W. Xu, Y. H. Ren, H. Wang, Y. Liu and Z. T. Li, *Nat. Commun.*, 2016, **7**, 11580.
6. L. Jiao, Y. Dong, X. Xin, L. Qin and H. Lv, *Appl. Catal. B. Environ.*, 2021, **291**, 120091.
7. L. Jiao, Y. Dong, X. Xin, R. Wang and H. Lv, *J. Mater. Chem. A*, 2021, **9**, 19725-19733.
